# Supplementary material for: Recent Advances of Natural Cellulosic Non-Woven Scaffolds for Tissue Engineering
Source: Preprints.org preprint supplement (doi:10.20944/preprints202202.0176.v1), 2022-02-14
Supplement: Supplementary file 1 [file supplementary]

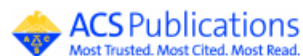

## Fabrication of Bacterial Cellulose-Based Dressings for Promoting Infected Wound Healing

Author: Fazli Wahid, Xiang-Jun Zhao, Xue-Qing Zhao, et al

Publication: Applied Materials

Publisher: American Chemical Society

Date: Jul 1, 2021

Copyright © 2021, American Chemical Society

### PERMISSION/LICENSE IS GRANTED FOR YOUR ORDER AT NO CHARGE

This type of permission/license, instead of the standard Terms and Conditions, is sent to you because no fee is being charged for your order. Please note the following:

- Permission is granted for your request in both print and electronic formats, and translations.
- If figures and/or tables were requested, they may be adapted or used in part.
- Please print this page for your records and send a copy of it to your publisher/graduate school.
- Appropriate credit for the requested material should be given as follows: "Reprinted (adapted) with permission from {COMPLETE REFERENCE CITATION}. Copyright {YEAR} American Chemical Society." Insert appropriate information in place of the capitalized words.
- One-time permission is granted only for the use specified in your RightsLink request. No additional uses are granted (such as derivative works or other editions). For any uses, please submit a new request.

If credit is given to another source for the material you requested from RightsLink, permission must be obtained from that source.

BACK

CLOSE WINDOW
