# Supplementary material for: Recent Advances of Natural Cellulosic Non-Woven Scaffolds for Tissue Engineering
Source: Preprints.org preprint supplement (doi:10.20944/preprints202202.0176.v1), 2022-02-14
Supplement: Supplementary file 4 [file supplementary]

Archive with 3 entries (3 files):
- permission 2.pdf
- Permission 3.pdf
- permission 1.pdf
